# Supplementary material for: Insights into the Predictors of Attitude toward Entomophagy: The Potential Role of Health Literacy: A Cross-Sectional Study Conducted in a Sample of Students of the University of Florence
Source: MDPI journal article supplement (doi:10.3390/ijerph18105306), 2021-05-17
Supplement: s1 [file s1]

## Questionario sulle abitudini alimentari

Il seguente questionario è anonimo e i dati saranno analizzati solo in forma aggregata ed utilizzati solo per analisi statistiche ai fini di ricerca scientifica. Le chiediamo gentilmente pochi minuti per compilare questa scheda.

**CORSO DI LAUREA:** \_\_\_\_\_

**SESSO:** ☐ Maschio ☐ Femmina **ETÀ:** \_\_\_\_\_

**PAESE DI ORIGINE:** ☐ Italia ☐ Altro Se altro, quale? \_\_\_\_\_

**ABITUDINI ALIMENTARI:** ☐ Onnivoro ☐ Vegetariano ☐ Vegano

### A. Hai mai sentito parlare di entomofagia?

☐ Sì ☐ No

### B. Dove hai sentito parlare di entomofagia?

- ☐ Eventi gastronomici
- ☐ Università
- ☐ Mass-media
- ☐ Altro

Se altro, quali? \_\_\_\_\_

### C. Sai che esiste una tradizione culinaria di entomofagia in alcuni paesi del mondo?

☐ Sì ☐ No

### D. Quali vantaggi potrebbero derivare dal consumo di insetti?

|                            |                                                                                                                                                    |
|----------------------------|----------------------------------------------------------------------------------------------------------------------------------------------------|
| COMPOSIZIONE NUTRIZIONALE: | Per niente <input type="checkbox"/> <input type="checkbox"/> <input type="checkbox"/> <input type="checkbox"/> <input type="checkbox"/> Tantissimo |
| IMPATTO AMBIENTALE:        | Per niente <input type="checkbox"/> <input type="checkbox"/> <input type="checkbox"/> <input type="checkbox"/> <input type="checkbox"/> Tantissimo |
| ALTERNATIVA ALLA CARNE:    | Per niente <input type="checkbox"/> <input type="checkbox"/> <input type="checkbox"/> <input type="checkbox"/> <input type="checkbox"/> Tantissimo |
| SAPORE GRADEVOLLE:         | Per niente <input type="checkbox"/> <input type="checkbox"/> <input type="checkbox"/> <input type="checkbox"/> <input type="checkbox"/> Tantissimo |
| FACILE REPERIBILITÀ:       | Per niente <input type="checkbox"/> <input type="checkbox"/> <input type="checkbox"/> <input type="checkbox"/> <input type="checkbox"/> Tantissimo |

### E. Quali svantaggi potrebbero derivare dal consumo di insetti?

|                          |                                                                                                                                                    |
|--------------------------|----------------------------------------------------------------------------------------------------------------------------------------------------|
| AVVERSITÀ CULTURALE:     | Per niente <input type="checkbox"/> <input type="checkbox"/> <input type="checkbox"/> <input type="checkbox"/> <input type="checkbox"/> Tantissimo |
| REAZIONI ALLERGICHE:     | Per niente <input type="checkbox"/> <input type="checkbox"/> <input type="checkbox"/> <input type="checkbox"/> <input type="checkbox"/> Tantissimo |
| PERICOLI MICROBIOLOGICI: | Per niente <input type="checkbox"/> <input type="checkbox"/> <input type="checkbox"/> <input type="checkbox"/> <input type="checkbox"/> Tantissimo |
| PERICOLI CHIMICI:        | Per niente <input type="checkbox"/> <input type="checkbox"/> <input type="checkbox"/> <input type="checkbox"/> <input type="checkbox"/> Tantissimo |

### F. Hai mai mangiato insetti o prodotti a base di insetti?

☐ Sì ☐ No Se Sì, quali? \_\_\_\_\_

**G. Perché potresti iniziare a mangiare di insetti?**

- ☐ Necessità
- ☐ Tradizioni locali / abitudini
- ☐ Per provare gusti diversi
- ☐ Caratteristiche nutrizionali
- ☐ Altre ragioni
- ☐ Non ci proverei mai

Se per altre ragioni, quali? \_\_\_\_\_

**H. Da 0 a 4, quanto trovi disgustoso mangiare insetti?**

Per niente ☐ ☐ ☐ ☐ ☐ Tantissimo

**I. Come preferisci mangiare gli insetti?**

- ☐ Insetti Interi
- ☐ Insetti sotto forma di farina
- ☐ In entrambi i modi
- ☐ In nessun modo

**L. Consigliaresti ad altri di provare insetti o prodotti a base di insetti?**

☐ Sì ☐ No

**M. Secondo te, quale organo di vigilanza dovrebbe essere responsabile del controllo della produzione di insetti per il consumo umano?**

- ☐ Stessa autorità assegnata come supervisore per i prodotti alimentari per il consumo umano
- ☐ Ai produttori/associazioni di produttori
- ☐ Ufficiali internazionali
- ☐ Non lo so

**N- HLS-EU-Q6**

**1. Secondo lei, quanto è difficile capire le informazioni riferite dai mezzi di comunicazione su come migliorare il suo stato di salute?**

- ☐ Molto difficile
- ☐ Abbastanza difficile
- ☐ Abbastanza facile
- ☐ Molto facile
- ☐ Non so

**2. Secondo lei, quanto è difficile giudicare se le informazioni, sui rischi per la salute, riferite dai mezzi di comunicazione siano attendibili?**

- ☐ Molto difficile
- ☐ Abbastanza difficile
- ☐ Abbastanza facile
- ☐ Molto facile

☐ Non so

**3. Secondo lei, quanto è difficile giudicare quali comportamenti quotidiani hanno un impatto sulla sua salute?**

- ☐ Molto difficile
- ☐ Abbastanza difficile
- ☐ Abbastanza facile
- ☐ Molto facile
- ☐ Non so

**4. Secondo lei, quanto è difficile capire i consigli da parte di familiari o amici riguardo alla salute?**

- ☐ Molto difficile
- ☐ Abbastanza difficile
- ☐ Abbastanza facile
- ☐ Molto facile
- ☐ Non so

**5- Secondo lei, quanto è difficile usare le informazioni che il medico le fornisce per prendere delle decisioni a proposito di una sua malattia?**

- ☐ Molto difficile
- ☐ Abbastanza difficile
- ☐ Abbastanza facile
- ☐ Molto facile
- ☐ Non so

**6- Secondo lei, quanto è difficile capire quando è necessaria una seconda opinione da parte di un altro medico?**

- ☐ Molto difficile
- ☐ Abbastanza difficile
- ☐ Abbastanza facile
- ☐ Molto facile
- ☐ Non so
